1 Wild red wolf *Canis rufus* poaching risk

2  
3 Suzanne W. Agan<sup>1</sup>, Adrian Treves<sup>2</sup>, Lisabeth Willey<sup>1</sup>

4  
5 <sup>1</sup> Environmental Studies Department, Antioch University New England, Keene, New Hampshire,  
6 United States of America

7  
8 <sup>2</sup> Carnivore Coexistence Lab, Nelson Institute for Environmental Studies, University of  
9 Wisconsin, Madison, Wisconsin, United States of America.

10  
11  
12 Corresponding author

13 Email: [suzanneagan@gmail.com](mailto:suzanneagan@gmail.com)

14  
15 Contributorship AT

16 Supervision AT, LW

17 Conceptualization AT

18 Methodology AT

19

## 20 **Abstract**

21 The reintroduced red wolf population in northeastern North Carolina declined to 7 known wolves  
22 by October 2020. Poaching (illegal killing) is the major component of verified anthropogenic  
23 mortality in this and many other carnivore populations, but it is still not well understood.  
24 Poaching is often underestimated, partly as a result of cryptic poaching, when poachers conceal  
25 evidence. Cryptic poaching inhibits our understanding of the causes and consequences of  
26 anthropogenic mortality which is important to conservation as it can inform us about future  
27 population patterns within changing political and human landscapes. We estimate risk for  
28 marked adult red wolves of 5 causes of death (COD: legal, nonhuman, unknown, vehicle and  
29 poached) and disappearance, describe variation in COD in relation to hunting season, and  
30 compare time to disappearance or death. We include unknown fates in our risk estimates. We  
31 found that anthropogenic COD accounted for 0.724 – 0.787, including cryptic and reported  
32 poaching estimated at 0.510 – 0.635 of 508 marked animals. Risk of poaching and disappearance  
33 was significantly higher during hunting season. Mean time from collaring until nonhuman COD  
34 averaged 376 days longer than time until reported poached and 642 days longer than time until  
35 disappearance. Our estimates of risk differed from prior published estimates, as expected by  
36 accounting for unknown fates explicitly. We quantify the effects on risk for three scenarios for  
37 disappearances, which span conservative to most likely COD. Implementing proven practices  
38 that prevent poaching or hasten successful reintroduction may reverse the decline to extinction in  
39 the wild of this critically endangered population. Our findings add to a growing literature on  
40 endangered species protections and enhancing the science used to measure poaching worldwide.

## 41 **Introduction**

42           Many large carnivores play a significant role in the function of ecosystems as keystone  
43 species through top-down regulation, resulting in increased biodiversity across trophic levels [1–  
44 4]. They do this by influencing prey populations through predation or behavioral changes of  
45 surviving prey, potentially influencing plants, scavengers, and an array of interacting species [5].  
46 They also influence smaller predator populations, which again has effects on smaller prey  
47 species. In California, the absence of coyotes, a top predator in that ecosystem, behaviorally  
48 released opossums, foxes, and house cats which preyed heavily on song birds and decreased the  
49 number of species of scrub-dependent birds [6]. In Yellowstone, the return of wolves as a  
50 keystone species triggered top down effects that were wide-spread throughout the park [4]. If the  
51 presence of a top predator such as a wolf increases biodiversity and has positive effects on  
52 ecosystem function, then the absence of such carnivores can simplify biodiversity long-term and  
53 significantly impair ecosystem processes [7].

54           Red wolves are the dominant top carnivore in the only ecosystem they occur wild, are  
55 believed to have evolved only in North America, and are critically endangered [8]. Restoring  
56 them to their native ecosystems in ecologically functional numbers would meet both the explicit  
57 and implicit demands of the Endangered Species Act (ESA) [9]. The USFWS is the  
58 implementing agency for terrestrial endangered species and it followed the ESA listing of the  
59 species by reintroducing them to northeastern NC (NENC). Management includes a permanent  
60 injunction in accordance with the 10(j) rule published in 1995 prohibiting the take of red wolves  
61 except for threat to human, livestock, or pet safety [10]. However, the reintroduced red wolf

62 population in NENC has been declining over the last 12 years to a low of only 7 known wolves  
63 in 2020 [11] and anthropogenic mortality remains the leading cause of death.

64 Even with legal protections, anthropogenic mortality is causing population decline in  
65 NENC red wolves and many mammalian carnivores around the world [12]. In studying losses of  
66 Mexican wolves, *Canis lupus baileyi*, researchers found anthropogenic mortality accounted for  
67 81% of all deaths [13]. Many studies show wolves face high levels of anthropogenic mortality  
68 [14–17], however the persistence of some carnivore populations in areas of high human density  
69 show human-carnivore coexistence with minimal killing is possible under certain conditions  
70 [18,19]. For example, Carter et al. found that tigers and humans co-existed even at small spatial  
71 scales, likely because tigers adjusted their activity to avoid encounters with people [19]. In North  
72 America, Linnel et al., found that carnivore populations increased after favorable policy was  
73 introduced (e.g., ESA protections), despite increases in human population density [20]. Finally  
74 Dickman et al, (2011) assessed how people changed their behavior, adopting non-lethal methods  
75 for coexistence through financial incentives [21]. With very small populations and limited  
76 genetic diversity, the loss of even one red wolf could affect recovery negatively [13]. For the  
77 ESA requirement to abate human-caused mortality in endangered species, those causes should be  
78 measured accurately, understood rigorously, and intervened against effectively.

79 The major cause of death in red wolves is poaching [22–24]. Poaching (illegal killing) is  
80 a major component of anthropogenic mortality in many carnivore populations [16,25], but it is  
81 still not well understood [26], disrupts management efforts [27], and is often under-estimated  
82 [28]. This underestimation is partly the result of cryptic poaching, when poachers conceal  
83 evidence [17,26,27,29], and it inhibits our understanding of animal life histories, policy  
84 interventions, and management actions [26,29]. As a percent of all mortality, poaching accounted

85 for 24 – 75% for different carnivore species and areas [30,31]. More than half of wolf mortalities  
86 in Scandinavia over the last decade are the result of poaching, with 66% of those having  
87 evidence concealed by the poacher [28]. In Wisconsin, poaching accounted for 39% - 45% of all  
88 wolf mortalities over a 32 year period with an estimated 50% cryptic, but this number is believed  
89 to be an underestimate because of non-reporting and uncertainty [16,17,26,28][17]. Although the  
90 USFWS invested large amounts in intervening to stop hybridization between red wolves and  
91 coyotes, the potentially stronger negative effects of anthropogenic mortality may deserve more  
92 attention.

93 Anthropogenic mortality decreases mean life expectancy for wolves, which has  
94 population wide effects. Red wolves rarely live over 10 years in the wild but up to 14 years in  
95 captivity according to the USFWS [32] however, red wolves in NENC live an average of only  
96 3.2 years in the wild with breeding pair duration of only 2 years [33]. This prevents the  
97 development of a multigenerational social structure and pack stability, a key factor in preventing  
98 hybridization with coyotes [33–35]. Theoretically, wild populations could compensate for  
99 anthropogenic mortality through decreases in natural mortality or increases in productivity [36].  
100 However, the strength of compensation in wolf populations is an area of active scientific  
101 controversy [14,37–39]. Also, poaching can be additive or super-additive if poachers kill a  
102 breeder or a lactating female. Super-additive mortality would result if death of a breeder also led  
103 to death of offspring. When dominant male red wolves are killed, there can be an increase in  
104 offspring mortality through mate turnover [40]. This is only more prominent in small populations  
105 at low density such as red wolves in NENC. If there is a large portion of non-breeding adults in  
106 the remaining population there is potential for recovery since new breeding pairs could take up  
107 residence, however long term compensation for anthropogenic mortality depends on survival of

108 those adults [36]. The Red Wolf Species Survival Plan and USFWS 5-year review both call for  
109 removal of threats that have the potential to bring about the extinction of red wolves  
110 [41,42]. Currently, anthropogenic mortality is the leading cause of death for wild red  
111 wolves in the endangered NENC population [22]. In the first 25 years of reintroduction,  
112 72% of known mortalities were caused by humans, and in many cases avoidable. These  
113 included suspected illegal killing, vehicle strikes, and private trapping [24]. Gunshot  
114 mortalities alone increased by 375% in the years 2004 – 2012 compared to the 5 previous  
115 years [24] and increased 7.2 times during deer hunting season when compared to the rest  
116 of the year. A higher percentage of wolves that go missing are unrecovered during this  
117 same time as opposed to outside the hunting season [23]. Human-caused mortalities also  
118 accounted for 40.6% of all breeding pair disbandment, mostly from gunshots [23] and natural  
119 replacement has decreased since the mid-2000's [23]. Poaching has not been adequately  
120 prevented [22]. Therefore, precise measurement of mortality using the most current and  
121 comprehensive data is critical to understand how sources of mortality influence red wolf  
122 population dynamics and its legal recovery under the ESA [22,25].

123         Measuring mortality risk, the proportion of all deaths attributable to a given cause,  
124 depends on many factors including the ability to monitor individuals over time. Following  
125 individuals with GPS or VHF technology is the standard method but can be costly, compromise  
126 animal welfare, and can create systematic bias when the technology fails, or wolves move out of  
127 range [43]. Because killing a red wolf is illegal under the ESA except in case of imminent harm  
128 to a human, there may be incentives for poachers to destroy evidence, including radio-collars,  
129 which limits the data available to researchers and adds to bias. Destruction of evidence is rarely,  
130 if ever, associated with nonhuman COD or legal human-induced COD [16]. Therefore,

131 measurement error caused by cryptic poaching adds a systematic bias. The possibility that  
132 marked animals were poached and monitoring interrupted by destruction of transmitters should  
133 be considered in poaching estimates lest we under-estimate the risk of poaching by considering  
134 only the subset that is observed by officials because the poacher left a transmitter intact.  
135 Problems such as these can be addressed with models that allow multiple sources of data to  
136 inform estimates of variables, including unobservable variables like cryptic poaching [16,28,44].  
137 For this study we define unknown fates as those animals that are radio-collared but become lost-  
138 to-contact and unmonitored. Most studies involving mortality data make assumptions that  
139 unknown fates resemble known fates [16]. When wolves are legally killed, they are always  
140 included in known fates and in calculated mortality risk. Treves et al. [16] tested the hypotheses  
141 in populations where cryptic poaching occurs, unknown fates will not accurately estimate known  
142 fates causing important losses of information producing systematic error. When they corrected  
143 estimates of mortality risk of four endangered wolf populations by excluding legal killing from  
144 unknown fates, their estimates of poaching risk were higher than government estimates, which  
145 assumed known fates would be representative of unknown fates. For example, when estimates  
146 for relative risk from other human causes included unknown fates, government reported risk for  
147 red wolves was 0.26 – 0.40 lower than corrected estimates [16]. By accounting for all marked  
148 animals,  $m$  (unknown fates) +  $n$  (known fates), and estimating cryptic poaching, we extract more  
149 information for mortality risk than traditional methods of censoring those marked animals that  
150 disappeared [16]. We will adapt the above methods to test the hypothesis that censoring or  
151 ignoring marked wolves that disappear under-estimates poaching and loses essential information  
152 to produce a systematic bias in conclusions about the NENC red wolves.

153 Here we 1) estimate mortality risk for 5 COD's (legal, poached, vehicle, nonhuman, and  
154 unknown) in the red wolf population from 1987 – 2018, 2) test for association between risk and  
155 hunting season, and 3) compare “time to event” for fate unknowns and various CODs. Our  
156 analysis adds several years of data not included in prior work and spans a period with a large  
157 decline in the wild red wolf population.

## 158 **Materials and Methods**

### 159 **Study area**

160 The red wolf recovery area (RWRA) consists of 6,000 km<sup>2</sup> of federal, state, and private  
161 land in five counties on the Albemarle Peninsula, Northeastern North Carolina (NENC):  
162 Beaufort, Dare, Hyde, Tyrrell, and Washington. This area includes four USFWS managed  
163 National Wildlife Refuges: Alligator River, Mattamuskeet, Pocosin Lakes, and Swanquarter, a  
164 Department of Defense bombing range, and state lands (Fig 1). Land cover types include 40%  
165 woody wetlands, 26% cultivated crops, 16% evergreen forest, 5% emergent herbaceous wetlands  
166 and other minor (less than 5%) land covers of developed, barren land, deciduous forest, mixed  
167 forest, shrub/scrub, herbaceous, and hay/pasture [45]. Elevation ranges between 0-50 m and  
168 climate is temperate with four distinct seasons [46].

169 Red wolves select agricultural habitats over forested areas and transient wolves select  
170 edges and roads in these areas more than residents [46]. This use of agricultural lands is in  
171 contrast to gray wolves in Wisconsin, which used these types of human landscapes less than  
172 expected by chance [17]. Red wolves that maintained stable home ranges between 2009-2011  
173 used 25-190 km<sup>2</sup> in area, while transients ranged 122-681 km<sup>2</sup> [46].

174 **Fig 1. Red wolf recovery area (RWRA) in NENC showing federal and state-owned lands and land cover**  
175 **types.** [45]



176

## 177 **Red wolf sampling**

### 178 **USFWS Monitoring**

179           Since reintroduction in 1987, the USFWS estimated abundance of red wolves [22] and  
180 maintained a database of all red wolves in the RWRA [47].. Efforts were made to collar every  
181 individual, however, radio-collared wolves are not a random sample of all wild red wolves  
182 because trapping locations are limited to those areas accessible by USFWS personnel, unknown  
183 wolves may have wandered out of the 5-county recovery area (dispersers) or were never caught,  
184 and pups (<7.5 months) were not radio-collared for their own safety. Red wolves were captured  
185 on federal and state lands as well as private lands with permission from landowners [46].  
186 Following Hinton et al. (2016) we define a red wolf year as October 1 – September 30.

187           The USFWS database contains information on trapping, tagging, and demographic and  
188 spatial information on 810 red wolves including an initial, suspected cause of death (COD), a  
189 final, official COD, and necropsy results if performed for each carcass found. These data were  
190 collected by the USFWS through field work, reports from trappers, private citizens, and  
191 mortality signals from radio-collars [47].

192           We used population estimates from each year from three sources for red wolf population  
193 data: the USFWS database, Hinton et al. (2016), and the 2016 Red Wolf Population Viability  
194 Analysis [22,47,48]. Population estimates from these three sources were consistent until 2000  
195 when they began to vary across sources. We do not know why the variation arose, so when the  
196 three sources varied, we presented a range of values from the three sources and used the median  
197 for analysis.

## 198 **Classifying fates**

199           We analyzed data for 508 radio-collared adult red wolves between the years 1987 – 2018  
200 (63% of all red wolves found in the database; the remaining 37% were pups or uncollared red  
201 wolves, which we excluded). The 508 include 393 wolves of known fate and 115 wolves of  
202 unknown fate (Table 1). We reclassified USFWS cause of death for known fates into 5 mutually  
203 exclusive classes: nonhuman, legal, poached, vehicle, and unknown COD (Table 2). Legal refers  
204 to legal removal by USFWS or by a permitted private individual; legal is the only perfectly  
205 documented COD in our dataset. All other CODs have different amounts of bias depending on  
206 cause, which we refer to as inaccurately documented causes of death, following Treves et al.  
207 [17]. Because the ESA made it illegal to kill a listed species except in defense of life [49], we  
208 define poaching as any non-permitted killing of a wolf such as shooting, poison, trapping, etc.,  
209 even if the intended target animal was not a red wolf [17]. We classified “vehicle” separately  
210 from poaching because the driver likely did not plan to kill any animal, following [16]. The  
211 USFWS listed 12 instances of “suspected foul play”, such as finding a cut collar but no wolf. We  
212 classified those as poached, following Hinton et al [22] and Treves et al. [17], because there are  
213 only two possibilities with a cut collar; someone removed the collar of a wolf that had already  
214 died of another cause, or they killed the wolf, both of which are illegal. Nonhuman causes  
215 include mortality related to intraspecific aggression and health related issues such as disease and  
216 age. Finally, unknown causes were carcasses whose COD could not be determined. These are  
217 important to include in our analyses, as discarding them would overrepresent perfectly reported  
218 legal killing [16].

219           Fate unknown (FU) wolves were lost to USFWS monitoring and never recovered.  
220           Eventually the USFWS stopped monitoring these collars because they could not locate them

221 through aerial or ground telemetry. This could happen if the collar stopped transmitting or if the  
 222 wolf was killed and the collar was destroyed, referred to as “cryptic poaching” [16,28]. The  
 223 USFWS assigned their FU date as the date of last contact. We included collared red wolves that  
 224 might still be alive but unmonitored (FU) at the time of this analysis because they are likely to be  
 225 dead as of writing and failure to include them would again overrepresent perfectly reported legal  
 226 killing [16].

227 **Table 1. Annual red wolf population size, COD and FU for collared, adult red wolves**  
 228

| Mortality and FU totals for wolf year Oct 1 - Sept 30 |                 |         |    |       |           |          |         |
|-------------------------------------------------------|-----------------|---------|----|-------|-----------|----------|---------|
|                                                       | Population Est. | Poached | FU | Legal | Collision | Nonhuman | Unknown |
| 1987-88                                               | 16              | 0       | 0  | 0     | 2         | 2        | 0       |
| 1988-89                                               | 15              | 0       | 0  | 0     | 1         | 2        | 0       |
| 1989-90                                               | 31              | 0       | 2  | 0     | 2         | 0        | 0       |
| 1990-91                                               | 34              | 0       | 0  | 0     | 2         | 4        | 0       |
| 1991-92                                               | 44              | 0       | 0  | 0     | 0         | 0        | 1       |
| 1992-93                                               | 67              | 0       | 1  | 0     | 0         | 2        | 0       |
| 1993-94                                               | 52              | 0       | 1  | 1     | 4         | 4        | 5       |
| 1994-95                                               | 44              | 7       | 2  | 1     | 1         | 2        | 3       |
| 1995-96                                               | 52              | 3       | 5  | 1     | 1         | 1        | 3       |
| 1996-97                                               | 46              | 0       | 3  | 2     | 3         | 2        | 1       |
| 1997-98                                               | 69              | 1       | 7  | 0     | 2         | 1        | 5       |
| 1998-99                                               | 90              | 3       | 10 | 2     | 0         | 4        | 2       |
| 1999-00                                               | 104             | 6       | 4  | 9     | 1         | 0        | 3       |
| 2000-01                                               | 96-108          | 4       | 3  | 0     | 2         | 1        | 7       |
| 2001-02                                               | 97-121          | 10      | 7  | 4     | 4         | 4        | 0       |
| 2002-03                                               | 102-128         | 5       | 1  | 3     | 3         | 7        | 0       |
| 2003-04                                               | 113-149         | 4       | 5  | 1     | 5         | 5        | 1       |
| 2004-05                                               | 125-151         | 7       | 7  | 2     | 2         | 4        | 2       |
| 2005-06                                               | 126-143         | 7       | 5  | 0     | 4         | 3        | 3       |
| 2006-07                                               | 116-134         | 9       | 7  | 1     | 3         | 1        | 2       |
| 2007-08                                               | 115-137         | 9       | 7  | 0     | 3         | 3        | 5       |
| 2008-09                                               | 111-138         | 5       | 8  | 0     | 3         | 1        | 10      |
| 2009-10                                               | 111-135         | 8       | 5  | 0     | 3         | 4        | 4       |
| 2010-11                                               | 112-123         | 6       | 4  | 0     | 3         | 5        | 6       |
| 2011-12                                               | 104-127         | 10      | 6  | 1     | 1         | 0        | 1       |
| 2012-13                                               | 103-112         | 12      | 4  | 0     | 3         | 1        | 3       |
| 2013-14                                               | 113-149         | 11      | 3  | 0     | 2         | 3        | 1       |
| 2014-15                                               | 74              | 11      | 4  | 2     | 0         | 0        | 3       |
| 2015-16                                               | 45-60           | 3       | 0  | 0     | 2         | 0        | 7       |
| 2016-17                                               | 20, 25-35       | 6       | 3  | 0     | 0         | 1        | 1       |
| 2017-18                                               | 19, 23-30       | 2       | 1  | 0     | 3         | 0        | 2       |

229 <sup>1</sup>Sources: USFWS database, Hinton et al (2016), and the 2016 Red Wolf Population Viability Analysis [22,47,48].

230  
 231 **Table 2. Red wolf fates, our classifications of COD, 1987 – 2018 for 508 radio-collared adults.** The variables  $n$   
 232 (known fate subset) estimates the sum of known COD, and  $m$  (unknown subset) estimates the sum of unknown (FU)  
 233 and unknown COD. FU are those wolves who were radio-collared but were lost to USFWS monitoring

234  
235

| USFWS official COD or fate | COD for this analysis | Number of marked adults |
|----------------------------|-----------------------|-------------------------|
| Management related         | Legal                 | 30                      |
| Permitted activity         |                       |                         |
| Gunshot                    | Reported Poached      | 149                     |
| Poison                     |                       |                         |
| Trapping                   |                       |                         |
| Vehicle                    | Vehicle               | 66                      |
| Intraspecific              | Nonhuman              | 67                      |
| Health/disease             |                       |                         |
|                            | <b>Subtotal for n</b> | <b>312</b>              |
| Unknown cause              |                       | 81                      |
| Fate unknown (FU)          |                       | 115                     |
|                            | <b>Subtotal for m</b> | <b>196</b>              |

236  
237

238

239

240

241

242

243

244

245

If we calculated the risk of each COD as a percent of known fates as is traditional, we would systematically bias against the imperfectly reported causes, disproportionately underestimate the least well-documented CODs following FU, such as cryptic poaching, and exaggerate the proportion of perfectly reported COD (Legal). Following the method in [16] instead, we estimate risk more accurately by taking into account how many of  $m$  to reallocate from the unknown COD and FU in Table 2 to our three classes of imperfectly reported CODs (vehicle, poaching, nonhuman). The reallocation step is an estimation procedure with several possible scenarios that apportion different amounts of  $m$  to cryptic poaching, vehicle, or nonhuman, depending on assumptions that we explain next (Fig 2).

246

247

248

249

250

251

252

253

254

255

256

**Fig 2. Unknown fates can be estimated**

Observed<sub>non</sub> is the number of marked animals of known fate that died from nonhuman causes. Observed<sub>veh</sub> is the number of marked animals of known fate that died of vehicle collisions, and Observed<sub>poa</sub> is the number of marked animals of known fate that died of poaching. Expected<sub>non</sub> is the number of marked animals of unknown fate expected dead from nonhuman causes, Expected<sub>veh</sub> is the number of marked animals of unknown fate expected dead from vehicle collision and Expected<sub>poa</sub> is the number of marked animals of unknown fate expected dead from poaching.  $P$  is the estimate of marked wolves dead from cryptic poaching. To account for the possibility of cryptic poaching with transmitter destruction before the wolf meets any other fate, we allocate  $m$  to the three imperfectly reported CODs. That is why the box for cryptic poaching appears above the others on the right side of the figure.

## 257 **Estimating risk from different causes of death**

258 Risk is defined as the proportion of all deaths attributable to a given cause. For example,  
259 if five out of ten wolf deaths are the result of poaching, then wolves in that population had a  
260 poaching risk of 50%. This is different from mortality rate, which is the rate of individuals dying  
261 per unit time, therefore the denominator is all wolves living or dead [17]. To estimate risk  
262 accurately, we need the denominator to be all collared red wolves ( $n + m$ , Fig 2, Table 2). With  $n$   
263 = 312 wolves with information on COD and  $m = 196$  wolves without information on COD  
264 (Table 2), the denominator for all risk estimates would be 508. See [16] for a full mathematical  
265 description of the method. Below we explain how we adapted it for the red wolf dataset.

266 First, we calculated the risk of legal killing, in a straightforward manner because they are  
267 all known fates perfectly reported by definition and there are none in  $m$ , the unknown fates  
268 portion (Fig 2). Therefore, we had to recalculate the risk posed by the 30 cases of legal killing  
269 (Table 1) with the denominator,  $n + m$ , to estimate the risk of legal killing for all collared red  
270 wolves at 5.9% (Table 3). Without this correction, risk of legal killing in Table 1 would be  
271 overestimated as 9.6%. When one over-estimates the risk of legal killing, one underestimates all  
272 other imperfectly reported CODs because the total must sum to 100%.

273 **Table 3. Risk of legal killing among collared red wolves**

274

|               | <b>Known fates (n)</b> | <b>Unknown fates (m)</b> | <b>Known + Unknown fates (n+m)</b> |
|---------------|------------------------|--------------------------|------------------------------------|
| Legal killing | legal/n                | 0                        | legal/(n+m)                        |
| Legal killing | 30/312 = 0.096         | 0                        | 30/508 = 0.059                     |

275  
276 With the straightforward case of legal killing recalculated as explained above, one can more  
277 efficiently explain how to account for the imperfectly reported CODs within  $m$  (Fig 4).

278 The unknown fate collared wolves in  $m$  contain only imperfectly reported CODs but an  
279 unknown number of each class of nonhuman, vehicle, and poached. Therefore, we must turn to

280 estimation techniques whose uncertainty produces bounds on our values. The 2 sources for  $m$  in  
281 figure 4 are unknown COD and FU. Poaching that left no trace, such as poisoning in the  
282 unknown COD or transmitter destruction in the FU subset, both might contribute to the  
283 subcategory of poaching we call cryptic poaching.

284 Transmitter failure that leads to an animal evading monitoring while the wolf is alive can  
285 happen for any of these CODs and account for a portion of  $m$ . When a transmitter fails and the  
286 animal is poached, it is not necessarily cryptic as the transmitter might fail before poaching and  
287 the poacher may not have tried to conceal the evidence. However, when the transmitter is  
288 destroyed by the poacher (rather than transmitter failure), then we define it as cryptic poaching.  
289 Cryptic poaching involves the destruction of evidence [28] distinguishing it from reported and  
290 unreported poaching that is present in both  $m$  and  $n$ . This changes the way in which we estimate  
291 poaching because there is a subset of cryptic poaching in  $m$  that is never represented in our  
292 known fate subset (Fig 2). We assume the destruction of a transmitter occurs earlier than  
293 transmitter failure and so when we estimated cryptic poaching, we deducted the estimate of  
294 cryptic poaching from  $m$  first, before we assign the rest of  $m$  to nonhuman, vehicle, and  
295 unreported poaching.

296 Previous work [16,17] assumed the lower estimate of cryptic poaching was zero.  
297 However, we assumed non-zero cryptic poaching in the NENC red wolf population because we  
298 had prior information. At least 23 reported poaching incidents in  $n$  show evidence of attempted  
299 and failed cryptic poaching (tampering or damage to the transmitter did not cause its failure, so  
300 the USFWS recovered the collar or carcass even though the poacher tried to conceal it). We  
301 categorized these 23 as failed cryptic poaching based on the following circumstances; only a  
302 damaged collar was found, the dead wolf was found with a damaged collar, or the dead wolf was

303 discovered in a suspicious location (e.g., dumped in a canal, near a beagle that had also been shot  
304 also found in that canal, and one was in the same location as another shot wolf). Damaged collars  
305 included obvious human tampering such as bullet holes and knife cuts. These 23 deaths include  
306 12 instances categorized by the USFWS as “suspected foul play” and 11 with suspicious  
307 circumstances recorded in field notes [47]. Therefore, we inferred that a scenario with zero  
308 cryptic poaching was so unlikely as to be discarded. We defined a range of plausible cryptic  
309 poaching with the following scenario building.

310 We used scenario building to triangulate on the probable real value and address  
311 uncertainty around a “most likely” outcome as in prior work [50]. Following [16], we used 3  
312 scenarios to estimate cryptic poaching (P). Scenario 1 assumes that poachers who tamper with  
313 evidence are equally successful as unsuccessful, so the risk of cryptic poaching in  $n$  (the 23  
314 wolves described above) is the same as the risk of cryptic poaching in  $m$ . Therefore, we  
315 estimated cryptic poaching as  $23/n$  ( $23/312 = 0.074$ ) meaning  $P = 0.074 * m = 14.4$  wolves were  
316 successfully concealed for cryptic poaching. We treat this as a lower bound because prior studies  
317 of cryptic poaching in wolves have estimated the frequency at 50-69% [17,28] which makes  
318 7.4% seem low.

319 By contrast our scenario 2 seems like a maximum bound, because we assumed all FU  
320 resulted from cryptic poaching but none of the unknown COD did. While this might over-  
321 estimate a few cases of transmitter failure, it might under-estimate cryptic poaching in the  
322 unknown COD cases that might include killing that was concealed by decomposition or  
323 untraceable toxins. Therefore, for scenario 2,  $P = 115$  wolves.

324 For Scenario 3 we rely on the published estimate of cryptic poaching for Wisconsin  
325 wolves, of 46% – 54%. We chose the Wisconsin estimate of two available because the other for

326 Scandinavian wolves would imply  $P > m$ , a logical impossibility. The Wisconsin estimate  
327 yielded  $P = 149$  wolves.

328 For all scenarios, we subtracted  $P$  from  $m$  first and then estimated the remainder in  $m$  as  
329 the expected numbers for nonhuman, vehicle, and poaching as follows:

330 
$$Expected_{non} = (m-P) * Observed_{non} / (Observed_{non} + Observed_{veh} + Observed_{poa})$$
 (equation 2a)

331 
$$Expected_{veh} = (m-P) * Observed_{veh} / (Observed_{non} + Observed_{veh} + Observed_{poa})$$
 (equation 2b)

332 
$$Expected_{poa} = (m-P) * Observed_{poa} / (Observed_{non} + Observed_{veh} + Observed_{poa})$$
 (equation 2c)

333 From the three subcategories of poaching, we can estimate total poaching (reported and  
334 cryptic).

## 335 **Timing of death and disappearance**

### 336 **Season**

337 We calculated monthly risk of each COD and used a chi-square analysis to evaluate  
338 whether the monthly distributions of CODs differed. We then used a binomial test to evaluate  
339 whether CODs during the hunting season (141 days from September 12 – January 31, to include  
340 all fall and winter hunting of black bear, deer, and waterfowl) was significantly different from  
341 the non-hunting season. Since NC issues nonresident hunting licenses, and several large hunting  
342 clubs operate within the five-county RWRA, there were annual influxes of permitted, armed  
343 hunters. Using data from 1987-2013, Hinton et al showed a dramatic decrease in survival during  
344 the months of October through December [22].

### 345 **Individual survival**

346 We estimated the amount of time individual red wolves spent in the wild from their  
347 collaring date to the date of death (with COD) or disappearance (FU) at last contact, all in mean



348 days. We expect a systematic under-estimate of time to FU because monitoring periods were  
349 presumably independent of the time that a transmitter stopped, so the last contact always  
350 preceded COD. This bias would tend to under-estimate the survival time for the imperfectly  
351 reported CODs, especially cryptic poaching relative to all other CODs and other imperfectly  
352 reported CODs relative to legal. Addressing this bias and conducting a formal time-to-event  
353 analysis was beyond our scope. Therefore, here we visually compared time-to-event across  
354 CODs and FU.

355 We conducted all analysis in STATA IC 15.1 for Mac [51].

## 356 Results

### 357 Estimating risk by cause of death (COD)

358 From 508 adult radio-collared red wolves, we estimated the risk of legal killing as 0.059  
359 which is less than half of the USFWS estimate of 0.13 [42] and higher than previously published  
360 studies of 0.04 – 0.05 [22,24,52]. Relative risk from human COD other than legal ranged from  
361 0.724 – 0.787 depending on the three scenarios for level of cryptic poaching (Table 4), which  
362 was 0.026 - 0.044 higher than Treves' corrected risk estimate using data from 1999 - 2007 [52],  
363 and 0.26 – 0.40 higher than government estimates using data from 1999-2007 [42].

364 **Table 4. Risk of legal, nonhuman and other human causes of death for known fates (*n*) and unknown fates**  
365 **(*m*) using 3 cryptic poaching scenarios (P from Eqs. 2a – c).** Total poaching is the sum of cryptic and reported  
366 poaching. Other human is the sum of Vehicle and Total Poaching.  
367

|                  |                  | Scenario 1, P=14.4 |            | Scenario 2, P=115 |            | Scenario 3, P=149 |            |
|------------------|------------------|--------------------|------------|-------------------|------------|-------------------|------------|
|                  | Risk in <i>n</i> | <i>m</i>           | <i>n+m</i> | <i>m</i>          | <i>n+m</i> | <i>m</i>          | <i>n+m</i> |
| Legal killing    | 0.096            | 0.000              | 0.059      | 0.000             | 0.059      | 0.000             | 0.059      |
| Nonhuman causes  | 0.215            | 0.220              | 0.217      | 0.098             | 0.170      | 0.057             | 0.154      |
| Other human      | 0.689            | 0.780              | 0.724      | 0.902             | 0.771      | 0.943             | 0.787      |
| Vehicle          | 0.212            | 0.217              | 0.214      | 0.097             | 0.167      | 0.056             | 0.152      |
| Total poaching   | 0.478            | 0.563              | 0.511      | 0.805             | 0.604      | 0.887             | 0.635      |
| Cryptic poaching | 0.000            | 0.074              | 0.028      | 0.587             | 0.378      | 0.760             | 0.342      |
| Reported poached | 0.478            | 0.489              | 0.482      | 0.218             | 0.226      | 0.127             | 0.293      |

368  
369 In scenario 1 with  $P = 14.4$ , we estimated total poaching risk at 0.511 with cryptic  
370 poaching accounting for 0.055 of total poaching. Scenario 2 with  $P = 115$ , our estimate of total  
371 poaching was 0.604, which is higher than all previously published estimates (Fig 3) including:  
372 0.33 higher than government estimates and 0.029 higher than Treves 2017. In this scenario,  
373 cryptic poaching accounted for 0.626 of total poaching, similar to the Scandinavian estimate  
374 [28]. In scenario 3 with  $P = 149$ , our estimate of total poaching was 0.635 with cryptic poaching  
375 accounting for 0.539 of total poaching as planned by using the Wisconsin estimate.

376 **Fig 3. Risk of poaching estimated with different methods from overlapping but different samples of years of**  
377 **the NENC red wolf population.** Treves [16] and this study presented 3 scenarios of cryptic poaching with a lower  
378 (open circle), middle (bar) and upper (closed circle) bound. Years of data vary by study [22,24,42,52].  
379  
380

## 381 **Timing of death and disappearance**

### 382 **Season**

383 In our sample of 508 collared, adult red wolves the three months spanning October to  
384 December accounted for 61% of all reported poached (October  $n=25$ , 17%, November  $n=35$ ,  
385 24%, December  $n=29$ , 20%), which is significantly higher than expected by chance (25%) (Fig  
386 4). The same three months also accounted for 43% of all FU classifications (October  $n=20$ , 17%,  
387 November  $n=12$ , 10%, December  $n=18$ , 16%) which is also significantly higher than expected  
388 by chance (25%) ( $\chi^2 = 136.7$ ,  $df=55$ ,  $p < 0.001$ ).

389 **Fig 4. Red wolf mortality each month (bars) compared to fate unknown (FU, black line).**

390 FU are represented with a black line because there is more uncertainty with date of disappearance than with date  
391 of known deaths. Causes of death include legal, vehicle, reported poached, nonhuman, and unknown cause of  
392 death (COD).  
393  
394  
395  
396  
397

398 We extended our analysis to the full annual hunting seasons of September 12 – January  
399 31 or 141 days. FU and reported poached occurred significantly more often than expected during  
400 hunting seasons, (binomial test for FU: expected 38.6%, observed 61 of 115 or 53%,  $p = 0.002$   
401 and reported poached was 104 of 149 or 70%,  $p < 0.001$ ). Unknown COD was significantly  
402 lower than expected during hunting seasons (22 of 81 or 27%,  $p = 0.04$ ). (Fig 5). There were no  
403 significant differences in vehicle, nonhuman, or legal COD.

404 **Fig 5. Red wolf deaths and disappearances (FU) by cause during hunting season (dark gray) and non-hunting**  
405 **season (light gray).** Hunting season is inclusive of all fall/winter hunting including white-tailed deer, black bear,  
406 and waterfowl.

407  
408

## 409 Time in the wild

410 Time after collaring until death or disappearance for 508 adult collared red wolves was  
411  $1009 \pm 45$  days SE (deaths only mean =  $1067 \pm 52$  SE, range 0 – 4,651 days (Fig 6). Nonhuman  
412 COD had the longest time in the wild and FU the briefest (Fig. 6), with significant differences  
413 between FU and CODs (ANOVA  $F(5,502) = 5.72$ ,  $p < 0.001$ ). Out of 115 wolves classified as  
414 FU, 92 disappeared 100 - 3471 days after collaring with 16 wolves between 41 – 100 days, 6  
415 wolves between 20 – 40 days, and only one at 9 days after collaring. Time to disappearance and  
416 time to death from legal and vehicle were very similar (Fig 6).

417 **Fig 6. Mean days from collaring to death or disappearance (FU).**

418  
419

## 420 Discussion

421 Our results for risk of various causes of death (COD), when compared to previous  
422 published estimates, support the need for including unknown fates in risk estimates. Legal risk  
423 would have been overestimated using only a known fate model, leading to other imperfectly

424 reported CODs being underestimated, first predicted by [16]. By summing known and unknown  
425 fates, our risk from anthropogenic causes is higher at 0.78 than previous estimates of 0.45 [52]  
426 and 0.61 [36]. The last corrected estimate (conducted with our same method) using data through  
427 2007 [16] was slightly lower than ours at 0.77, suggesting either that uncertainty in both  
428 estimates make the two entirely overlapping despite our inclusion of 11 additional years of data  
429 or possibly that there has been a slight increase in anthropogenic mortality since that time.  
430 Ultimately, anthropogenic mortality reduces the probability of a self-sustaining population, the  
431 goal of the USFWS red wolf recovery plan, and could ultimately cause the extinction of the  
432 species in the wild in the absence of intervention [53]. Human CODs also violate the Endangered  
433 Species Act prohibitions on take.

434 We estimated total poaching at 0.51 – 0.635 of 508 collard, adult red wolves, with cryptic  
435 poaching alone accounting for 0.028 – 0.378 (5-63% of total poaching). Our most conservative  
436 estimate for the risk of total poaching at 0.51 is also higher than any previously published risk  
437 estimate for red wolves, which ranged from 0.26 [52] to 0.44 [16]. Moreover, our less  
438 conservative scenarios estimate cryptic poaching at 0.54 and 0.63, similar to the Wisconsin  
439 estimate of 0.50 [16] and the Scandinavian estimate of 0.66 [28]. All three of our red wolf  
440 cryptic poaching scenarios lead to very similar total poaching risk, suggesting that regardless of  
441 the scenario, wolves in NENC are at higher risk from poaching than any other COD. This  
442 supports previous work that suggested poaching might be the cause of decline of this introduced  
443 population compared to success in another reintroduced population in Yellowstone [54]. We also  
444 suspect poaching of red wolves is higher than any other wolf population measured thus far.

445 We detected an increase in risk of reported poaching and disappearances during the late  
446 fall hunting seasons, similar to other studies that have shown population declines during this

447 same season in red wolves [22], gray wolves [17], and coyotes [55]. Just before fall hunting  
448 season, agricultural fields in this region, which make up approximately 30% of the red wolf  
449 recovery area [46], are typically cleared of protective cover for wolves [22]. This pattern is quite  
450 different from patterns during regulated summer hunting for turkeys from April – May when  
451 fields remain covered, vegetation is in leaf, and we found no significant increase in reported  
452 poaching or disappearances of red wolves. Although any type of hunting can mean more  
453 opportunity for poaching, the lack of an increase in red wolf poaching during the turkey season  
454 suggests the hypothesis that other types of hunters are implicated in red wolf poaching. The  
455 number of hunting licenses has increased every year in each of the five counties [56] and  
456 additional hunters on the landscape could mean more opportunities for poaching. In our study, all  
457 other mortality risk for collared, adult red wolves decreased (vehicle, nonhuman, unknown) or  
458 remains the same (legal) during legal hunting seasons on other wildlife.

459       Adult, collared, red wolves also disappeared (FU) more during hunting seasons,  
460 suggesting a possible relationship with poaching. This finding is also consistent with the  
461 assumption that many FU's result from cryptic poaching (scenario 2). We estimated FU as  
462 cryptic poaching, but many readers will wonder if fate unknown (FU) might not be largely  
463 emigrants out of NENC or transmitter failures followed by deaths of other causes in which  
464 carcasses were never recovered, rather than cryptic poaching. We draw on research with  
465 Wisconsin gray wolves and Mexican wolves [17,57] that provided numerous independent lines  
466 of evidence that the majority of FU could not be emigrants nor transmitter failures. First and  
467 most importantly, the gray and Mexican wolf studies demonstrated that rates of FU changed with  
468 policies on legal killing, which could not plausibly have caused transmitter failures. We cannot  
469 see a plausible reason why transmitter failure would explain red wolf FU when it did not for gray

470 and Mexican wolves. Might a difference in ecosystem or latitude play a role in transmitter failure  
471 in NENC? Lower temperatures are associated with battery failures, yet the seasonal pattern of  
472 FU in NENC matches that of reported poaching, not the annual low temperatures that occur in  
473 the months of January through March in NC. Also, average low temperature in NC for this  
474 period is between 30 – 40 degrees, while WI averages between 0 – 16 degrees making  
475 transmitter failure due to low temperature even less plausible. Also, battery life would seem to  
476 play a greater role if FU occurred long after collaring. Contrary to this expectation, FU ( $808 \pm 84$   
477 SE days) was much shorter than nonhuman COD ( $1450 \pm 154$  SE days) . Second, if FU were  
478 largely made up of emigrants, these individuals would likely have died on roads in the densely  
479 settled counties beyond the NENC and some of these would have been reported to law  
480 enforcement. Even if emigrant collared red wolves escaped the NENC peninsula, some would  
481 have been found by citizens with nothing to hide who presumably would have reported their  
482 observations to authorities. No such cases are known to us and USFWS data show FU locations  
483 clustered amongst other CODs rather than along the edges of the RWRA. Also, dispersal of  
484 radio-collared red wolves seems unlikely in an ecosystem with low saturation and abundant,  
485 frequent vacancies in territories. Finally, our scenarios encompass non-poaching related  
486 explanations for FU and yet total poaching exceeds all other CODs given the known fates and all  
487 outcomes we considered.

488         Some of this poaching, whether cryptic or reported/unreported, is sometimes attributed to  
489 mistaken identity. Since red wolves were reintroduced, coyotes have migrated into eastern NC  
490 and have been subject to intense shooting and trapping control efforts by regulated hunting [23].  
491 Efforts therefore have been made to limit those occurrences of red wolf killing. Current NC state  
492 hunting regulations in the five-county red wolf recovery area restrict coyote hunting to daytime

493 hours only and with a permit [58]. However, this continued allowance of coyote killing reflects a  
494 blind spot to the problem of poaching and further efforts to limit this mistaken identity may be  
495 necessary. The ESA “Similarity of Appearance” clause allows the Secretary to treat any species  
496 as an endangered species if “the effect of the substantial difficulty (to differentiate between the  
497 listed and unlisted species) is an additional threat to an endangered or threatened species, and  
498 such treatment of an unlisted species will substantially facilitate the enforcement and further the  
499 policy of this Act.” (ESA, Sec.4.e). The 1987 amendments to the ESA do not define  
500 “knowingly” to include knowledge of an animals species or its protected status, rather it means  
501 the act was done voluntarily and intentionally and not because of a mistake or accident [49]. The  
502 McKittrick policy which required a perpetrator must have known they were shooting a listed  
503 species before they could be prosecuted, was challenged successfully in federal district court  
504 [59], then overturned in the appellate court. Newcomer et al. consider Congressional intent in  
505 drafting the ESA was clear that harming a listed species would be a crime regardless of the intent  
506 or knowledge of the perpetrator, but the McKittrick policy weakens that protection [49].

507 Our analysis relied on USFWS data for COD and disappearances because we could not  
508 verify these independently, which is a limitation of this study. Also, the USFWS has not used  
509 GPS collars on red wolves since 2013 and VHF location data includes death locations but not all  
510 wolf movements. Previous survival analyses on wildlife populations have not accounted for  
511 certain causes of death and disappearance such as policy changes, nor have they been able to  
512 model how individual wolves experience policy over time. Traditional survival analyses do not  
513 accurately represent marked animals that disappear (FU) since most are censored and not  
514 included in outcomes. While survival analysis can model changes in hazard rates, it does not  
515 verify why those changes take place such as possible social reasons for increased or decreased

516 poaching. We recommend a time-to-event survival analysis that includes policy period as an  
517 intervention since increased poaching appears to be correlated with policy volatility [57].

518         Although there could be other factors affecting poaching numbers, political volatility  
519 [60], and evolving state policy appears to have affected killing of red wolves. For example,  
520 North Carolina House Bill 2006, effective January 1, 1995, allowed landowners to use lethal  
521 means to take red wolves on their property in Hyde and Washington counties in cases of defense  
522 of not only human life (as was always allowed by the ESA regulations) but also threat to  
523 livestock, provided the landowner had requested removal by the USFWS. After this policy was  
524 enacted, four wolves were shot over the course of Nov 1994 to Dec 1995 [60], the first known to  
525 be poached since reintroduction. It seems that both state and federal policy in NC have been less  
526 positive for red wolves and may partially explain why the population has declined to near-zero  
527 [61]. The USFWS was repeatedly warned about the problem of poaching while there was still  
528 time, with a population of 45 – 60 in 2016 [22,48] and beginning in 2017 were notified of the  
529 problem of cryptic poaching being underestimated [16]. Those results were shared with the  
530 USFWS in public comments in 2018, an official peer review in 2019 and earlier warnings were  
531 repeated when comments on red wolves were solicited. It appears there has been negligence or  
532 intentional disregard for poaching and the mandates of the ESA.

533         The USFWS will need to implement favorable policy that prohibits, and interdicts take of  
534 red wolves. Killing of red wolves for any reason, other than defense of human life, may actually  
535 devalue wolves leading to increases in poaching [29,57]. Rather, programs that reward the  
536 presence of wolves can increase their value to local residents. One example of favorable policy  
537 related to carnivores was the wolverine program in Sweden, which offered rewards to Sami  
538 reindeer herding communities for having reproducing female wolverines on their communal



539 lands [62,63]. Across North America, success of carnivore populations has been linked to legal  
540 protections and enforcement [57,64]. Therefore managing wolves successfully, by protecting  
541 wolves and encouraging acceptance, might be one way to generate support for their restoration  
542 [65]. In NENC policy has changed at both the state and federal level several times since  
543 reintroduction began and is currently being reviewed for further changes. This makes it difficult  
544 for residents to understand what current regulations are and can lead to confusion about what is  
545 allowed or not allowed with regard to killing red wolves. To maintain a positive working  
546 relationship with private landowners, USFWS might adapt and enforce policy that is consistent,  
547 clear, and protects wolves throughout the entire red wolf recovery area [66] even if it means  
548 standing up to illegal actors and communities that condone such law-breaking. Persuading the  
549 public to support red wolf recovery might be difficult if landowners resist ESA protections for  
550 the animals.

551       Because approximately 76% of the RWRA is private, and poaching occurs more on  
552 private land than public [47], any anti-poaching measure implemented must be proven to work  
553 on these lands. Knowledge of wolves' locations through radio-collaring, trail cameras, and other  
554 methods simplify all aspects of management by allowing biologists to locate wolves for any  
555 reason including human conflict and should be a part of anti-poaching management. In the past,  
556 the USFWS had access to approximately 197,600 acres of private lands through both written and  
557 oral agreements. We believe that this has decreased in recent years, both because there are fewer  
558 wolves on private land, and because some landowners are no longer as supportive of the program  
559 or as willing to allow access, but we cannot quantify the change.

560       This study suggests aggressive interventions against poaching immediately would be  
561 needed if there is going to be any chance the remaining 20 red wolves [61] can create a self-

562 sustaining population. In their most recent 5-year review completed in 2018, the USFWS  
563 recommended the red wolf retain its status as endangered under the ESA [67]. While there have  
564 been significant changes in the RWRA since reintroduction began, such as the migration of  
565 coyotes into the area and rising problems with poaching, the area still retains most of what made  
566 it appealing to reintroduction in the first place including low human density and suitable habitat  
567 of large areas of woody wetlands, agricultural lands, and protected areas. With the Red Wolf  
568 Adaptive Management Plan [68], the USFWS took an aggressive and successful approach to the  
569 encroachment of coyotes [68] and should do the same with poaching as mandated by the ESA.  
570 Implementing proven practices that prevent poaching or hasten successful reintroduction can  
571 reverse the trend of a decreasing NENC red wolf population and once again allow red wolves to  
572 thrive, not only in NENC but additional future reintroduction sites.

## 573 **Acknowledgments**

574 We thank the USFWS for access to their red wolf database and numerous conversations  
575 about the reintroduction program in NENC. We thank Dr. Joseph Hinton from the University of  
576 Georgia who provided not only access to his field notes and data but also his guidance and  
577 expertise regarding the red wolf program from a research perspective. Thank you to the  
578 Carnivore Coexistence Lab at the University of Wisconsin Madison, especially Dr. Francisco J.  
579 Santiago-Avila, for their statistical assistance and brainstorming sessions.

## 580 **References**

- 581 1. Miller B, Dugelby B, Foreman D, Del Río CM, Noss R, Phillips M, et al. The importance of  
582 large carnivores to healthy ecosystems. *Endanger Species Update*. 2001;18: 202–210.
- 583 2. Noss RF, Quigley HB, Hornocker MG, Merrill T, Paquet PC. Conservation biology and  
584 carnivore conservation in the Rocky Mountains. *Conserv Biol*. 1996;10: 949–963.  
585 doi:<https://doi.org/10.1046/j.1523-1739.1996.10040949.x>
- 586 3. Carroll C, Phillips MK, Lopez-Gonzalez CA, Schumaker NH. Defining recovery goals and  
587 strategies for endangered species: the wolf as a case study. *BioScience*. 2006;56: 25–37.  
588 doi:[https://doi.org/10.1641/0006-3568\(2006\)056\[0025:drgasf\]2.0.co;2](https://doi.org/10.1641/0006-3568(2006)056[0025:drgasf]2.0.co;2)
- 589 4. Smith DW, Peterson RO, Houston DB. Yellowstone after wolves. *BioScience*. 2003;53: 330–  
590 340. doi:[https://doi.org/10.1641/0006-3568\(2003\)053\[0330:yaw\]2.0.co;2](https://doi.org/10.1641/0006-3568(2003)053[0330:yaw]2.0.co;2)
- 591 5. Crooks KR, Soulé ME. Mesopredator release and avifaunal extinctions in a fragmented  
592 system. *Nature*. 1999;400: 563–566.
- 593 6. Henke SE, Bryant FC. Effects of coyote removal on the faunal community in western Texas.  
594 *J Wildl Manag*. 1999; 1066–1081.
- 595 7. Dobson A, Lodge D, Alder J, Cumming GS, Keymer J, McGlade J, et al. Habitat Loss, Trophic  
596 Collapse, and the Decline of Ecosystem Services. *Ecology*. 2006;87: 1915–1924.  
597 doi:[https://doi.org/10.1890/0012-9658\(2006\)87\[1915:HLTCAT\]2.0.CO;2](https://doi.org/10.1890/0012-9658(2006)87[1915:HLTCAT]2.0.CO;2)
- 598 8. Phillips M. *Canis rufus* (errata version published in 2020). The IUCN Red List of Threatened  
599 Species. 2018 [cited 10 Sep 2020]. doi:[https://dx.doi.org/10.2305/IUCN.UK.2018-  
600 2.RLTS.T3747A163509841.en](https://dx.doi.org/10.2305/IUCN.UK.2018-2.RLTS.T3747A163509841.en).
- 601 9. United States. The Endangered Species Act as amended by Public Law 97-304 (the  
602 Endangered Species Act amendments of 1982). Washington : U.S. G.P.O., 1983.; 1983.  
603 Available: <https://search.library.wisc.edu/catalog/999606103702121>
- 604 10. Endangered and Threatened Wildlife and Plants; Red Wolves in North Carolina and  
605 Tennessee; Revision of the Special Rule for Nonessential Experimental Populations; Final  
606 Rule. Department of the Interior; 1995. Available:  
607 [https://www.fws.gov/redwolf/Reviewdocuments/1995\\_FR\(60\)18940-18948.pdf](https://www.fws.gov/redwolf/Reviewdocuments/1995_FR(60)18940-18948.pdf)
- 608 11. USFWS. Red Wolf Partnership Coordination Call – Q4. 2020. Available:  
609 <https://www.fws.gov/southeast/pdf/notes/red-wolf-partnership-call-2020-10-15.pdf>
- 610 12. Woodroffe R, Ginsberg JR. Edge effects and the extinction of populations inside protected  
611 areas. *Science*. 1998;280: 2126–2128. doi:<https://doi.org/10.1126/science.280.5372.2126>

- 612 13. Turnbull TT, Cain JW, Roemer GW. Anthropogenic impacts to the recovery of the Mexican  
613 gray wolf with a focus on trapping-related incidents. *Wildl Soc Bull.* 2013;37: 311.  
614 doi:<https://doi.org/10.1002/wsb.247>
- 615 14. Adams LG, Stephenson RO, Dale BW, Ahgook RT, Demma DJ. Population dynamics and  
616 harvest characteristics of wolves in the central Brooks Range, Alaska. *Wildl Monogr.*  
617 2008;170: 1–25.
- 618 15. Smith DW, BANGS EE, OAKLEAF JK, MACK C, FONTAINE J, BOYD D, et al. Survival of  
619 Colonizing Wolves in the Northern Rocky Mountains of the United States, 1982-2004. *J*  
620 *Wildl Manag.* 2010;74: 620–634.
- 621 16. Treves A, Artelle KA, Darimont CT, Parsons DR. Mismeasured mortality: correcting  
622 estimates of wolf poaching in the United States. *J Mammal.* 2017;98: 1256–1264.  
623 doi:<https://doi.org/10.1093/jmammal/gyx052>
- 624 17. Treves A, Langenberg JA, López-Bao JV, Rabenhorst MF. Gray wolf mortality patterns in  
625 Wisconsin from 1979 to 2012. *J Mammal.* 2017;98: 17–32.  
626 doi:<https://doi.org/10.1093/jmammal/gyw145>
- 627 18. Llaneza L, López-Bao JV, Sazatornil V. Insights into wolf presence in human-dominated  
628 landscapes: the relative role of food availability, humans and landscape attributes. *Divers*  
629 *Distrib.* 2012;18: 459–469. doi:<https://doi.org/10.1111/j.1472-4642.2011.00869.x>
- 630 19. Carter NH, Shrestha BK, Karki JB, Pradhan NMB, Liu J. Coexistence between wildlife and  
631 humans at fine spatial scales. *Proc Natl Acad Sci.* 2012;109: 15360–15365.  
632 doi:<https://doi.org/10.1073/pnas.1210490109>
- 633 20. Linnell JD, Swenson JE, Anderson R. Predators and people: conservation of large carnivores  
634 is possible at high human densities if management policy is favourable. Cambridge  
635 University Press; 2001. pp. 345–349. doi:<https://doi.org/10.1017/s1367943001001408>
- 636 21. Dickman AJ, Macdonald EA, Macdonald DW. A review of financial instruments to pay for  
637 predator conservation and encourage human–carnivore coexistence. *Proc Natl Acad Sci.*  
638 2011;108: 13937–13944. doi:10.1073/pnas.1012972108
- 639 22. Hinton JW, White GC, Rabon DR, Chamberlain MJ. Survival and population size estimates  
640 of the red wolf. *J Wildl Manag.* 2016. doi:<https://doi.org/10.1002/jwmg.21206>
- 641 23. Hinton JW, Brzeski KE, Rabon DRJ, Chamberlain MJ. Effects of anthropogenic mortality on  
642 Critically Endangered red wolf *Canis rufus* breeding pairs: implications for red wolf  
643 recovery. *Oryx.* 2015;FirstView: 1–8. doi:10.1017/S0030605315000770
- 644 24. Bartel RA, Rabon D. Re-introduction and recovery of the red wolf in the southeastern USA.  
645 *Glob Re-Introd Perspect 2013 Furth Case Stud Globe.* 2013; 107.

- 646 25. Woodroffe R, Ginsberg JR. Conserving the African wild dog *Lycaon pictus*. I. Diagnosing and  
647 treating causes of decline. *Oryx*. 1999;33: 132–142. doi:<https://doi.org/10.1046/j.1365-3008.1999.00052.x>  
648
- 649 26. Browne-Nuñez C, Treves A, MacFarland D, Voyles Z, Turng C. Tolerance of wolves in  
650 Wisconsin: a mixed-methods examination of policy effects on attitudes and behavioral  
651 inclinations. *Biol Conserv*. 2015;189: 59–71.  
652 doi:<https://doi.org/10.1016/j.biocon.2014.12.016>
- 653 27. Carter NH, López-Bao JV, Bruskotter JT, Gore M, Chapron G, Johnson A, et al. A conceptual  
654 framework for understanding illegal killing of large carnivores. *Ambio*. 2017; 1–14.  
655 doi:<https://doi.org/10.1007/s13280-016-0852-z>
- 656 28. Liberg O, Chapron G, Wabakken P, Pedersen HC, Hobbs NT, Sand H. Shoot, shovel and shut  
657 up: cryptic poaching slows restoration of a large carnivore in Europe. *The Royal Society*;  
658 2012. pp. 910–915. doi:<https://doi.org/10.1098/rspb.2011.1275>
- 659 29. Treves A, Bruskotter J. Tolerance for predatory wildlife. *Science*. 2014;344: 476–477.  
660 doi:<https://doi.org/10.1126/science.1252690>
- 661 30. Chapron G, Miquelle DG, Lambert A, Goodrich JM, Legendre S, Clobert J. The Impact on  
662 Tigers of Poaching versus Prey Depletion. *J Appl Ecol*. 2008;45: 1667–1674.  
663 doi:<https://doi.org/10.1111/j.1365-2664.2008.01538.x>
- 664 31. Treves A, Chapron G, López-Bao JV, Shoemaker C, Goeckner AR, Bruskotter JT. Predators  
665 and the public trust. *Biol Rev*. 2015. doi:<https://doi.org/10.1111/brv.12227>
- 666 32. Beyer A, Sumner P, Olfenbuttel C, Proctor C. NC Wildlife Profiles, Red Wolf. NCWRC,  
667 Division of Conservation Education; 2020. Available:  
668 <https://www.ncwildlife.org/portals/0/learning/documents/profiles/redwolf.pdf>
- 669 33. Bohling JH, Waits LP. Factors influencing red wolf–coyote hybridization in eastern North  
670 Carolina, USA. *Biol Conserv*. 2015;184: 108–116.  
671 doi:<https://doi.org/10.1016/j.biocon.2015.01.013>
- 672 34. Bohling JH, Waits LP. Assessing the prevalence of hybridization between sympatric *Canis*  
673 species surrounding the red wolf (*Canis rufus*) recovery area in North Carolina. *Mol Ecol*.  
674 2011;20: 2142–2156. doi:<https://doi.org/10.1111/j.1365-294x.2011.05084.x>
- 675 35. Rutledge LY, White BN, Row JR, Patterson BR. Intense harvesting of eastern wolves  
676 facilitated hybridization with coyotes. *Ecol Evol*. 2012;2: 19–33.  
677 doi:<https://doi.org/10.1002/ece3.61>
- 678 36. Sparkman AM, Waits LP, Murray DL. Social and Demographic Effects of Anthropogenic  
679 Mortality: A Test of the Compensatory Mortality Hypothesis in the Red Wolf. *PLoS ONE*.  
680 2011;6: 1–9. doi:<https://doi.org/10.1371/journal.pone.0020868>

- 681 37. Creel S, Rotella JJ. Meta-analysis of relationships between human offtake, total mortality  
682 and population dynamics of gray wolves (*Canis lupus*). *PLoS One*. 2010;5.  
683 doi:10.1371/journal.pone.0012918
- 684 38. Gude JA, Mitchell MS, Russell RE, Sime CA, Bangs EE, Mech LD, et al. Wolf population  
685 dynamics in the US Northern Rocky Mountains are affected by recruitment and  
686 human-caused mortality. *J Wildl Manag*. 2012;76: 108–118.
- 687 39. Vucetich JA. Appendix: the influence of anthropogenic mortality on wolf population  
688 dynamics with special reference to Creel and Rotella (2010) and Gude et al.(2011) in the  
689 Final peer review of four documents amending and clarifying the Wyoming gray wolf  
690 management plan. *Congr Fed Regist*. 2012;50: 78–95.
- 691 40. Milner JM, Nilsen EB, Andreassen HP. Demographic side effects of selective hunting in  
692 ungulates and carnivores. *Conserv Biol*. 2007;21: 36–47.  
693 doi:<https://doi.org/10.1111/j.1523-1739.2006.00591.x>
- 694 41. US Fish and Wildlife Service. Red wolf recovery/species survival plan. US Fish Wildl Serv  
695 Atlanta Ga. 1990.
- 696 42. Fazio B. Red wolf (*Canis rufus*) 5 year status review: summary and evaluation. US Fish Wildl  
697 Serv Manteo N C USA. 2007.
- 698 43. Mech LD, Barber SM. A critique of wildlife radio-tracking and its use in National Parks: a  
699 report to the National Park Service. Jamestown, ND; 2002. Available:  
700 <http://pubs.er.usgs.gov/publication/93895>
- 701 44. Tavecchia G, Besbeas P, Coulson T, Morgan BJ, Clutton-Brock TH. Estimating population  
702 size and hidden demographic parameters with state-space modeling. *Am Nat*. 2009;173:  
703 722–33. doi:10.1086/598499
- 704 45. Homer C, Dewitz J, Jin S, Xian G, Costello C, Danielson P, et al. Conterminous United States  
705 land cover change patterns 2001–2016 from the 2016 National Land Cover Database.  
706 *ISPRS J Photogramm Remote Sens*. 2020;162: 184–199.  
707 doi:<https://doi.org/10.1016/j.isprsjprs.2020.02.019>
- 708 46. Hinton JW, Proctor C, Kelly MJ, van Manen FT, Vaughan MR, Chamberlain MJ. Space Use  
709 and Habitat Selection by Resident and Transient Red Wolves (*Canis rufus*). *PLoS One*.  
710 2016;11: e0167603. doi:<https://doi.org/10.1371/journal.pone.0167603>
- 711 47. USFWS. USFWS red wolf database. 2018.
- 712 48. Faust LJ, Simonis JS, Harrison R, Waddell W, Long S. Red Wolf (*Canis rufus*) Population  
713 Viability Analysis - Report to U.S. Fish and Wildlife Service. Lincoln Park Zoo, Chicago; 2016.

- 714 49. Newcomer E, Palladini M, Jones L. The Endangered Species Act v. the United States  
715 Department of Justice: how the Department of Justice derailed criminal prosecutions  
716 under the Endangered Species Act. *Anim Law*. 2011;17: 241–271.
- 717 50. Duinker PN, Greig LA. Scenario analysis in environmental impact assessment: Improving  
718 explorations of the future. *Environ Impact Assess Rev*. 2007;27: 206–219.  
719 doi:<https://doi.org/10.1016/j.eiar.2006.11.001>
- 720 51. StataCorp. *Stata Statistical Software: Release 15*. College Station, TX: StataCorp LLC; 2019.
- 721 52. Murray DL, Bastille-Rousseau G, Adams JR, Waits LP. The challenges of red wolf  
722 conservation and the fate of an endangered species recovery program. *Conserv Lett*.  
723 2015;8: 338–344. doi:<https://doi.org/10.1111/conl.12157>
- 724 53. Hinton JW, Chamberlain MJ, Rabon DR. Red wolf (*Canis rufus*) recovery: a review with  
725 suggestions for future research. *Animals*. 2013;3: 722–744.  
726 doi:<https://doi.org/10.3390/ani3030722>
- 727 54. Smith DW, Bangs EE. Reintroduction of wolves to Yellowstone National Park: history,  
728 values, and ecosystem restoration. *Reintroduction Top-Order Predat Oxf Wiley-Blackwell*.  
729 2009; 92–125. doi:<https://doi.org/10.1002/9781444312034.ch5>
- 730 55. Chamberlain MJ, Leopold BD. Survival and cause-specific mortality of adult coyotes (*Canis*  
731 *latrans*) in central Mississippi. *Am Midl Nat*. 2001;145: 414–418.  
732 doi:[https://doi.org/10.1674/0003-0031\(2001\)145\[0414:sacsmo\]2.0.co;2](https://doi.org/10.1674/0003-0031(2001)145[0414:sacsmo]2.0.co;2)
- 733 56. NC Wildlife Resources Commission. *NC Hunting priveleges by county*. 2019.
- 734 57. Santiago-Ávila FJ, Chappell RJ, Treves A. Liberalizing the killing of endangered wolves was  
735 associated with more disappearances of collared individuals in Wisconsin, USA. *Sci Rep*.  
736 2020;10: 1–14.
- 737 58. North Carolina Wildlife Resources Commission. *Hunting Regulations*. North Carolina  
738 Wildlife Resources Commission; 2017. Available:  
739 <http://www.ncwildlife.org/Portals/0/Regs/Documents/Hunting-Regulations.pdf>
- 740 59. US District Court Arizona. *WildEarth Guardians, et al. v U.S. Department of Justice*. 2015.
- 741 60. Gilbreath JD, Henry VG. *Red Wolf Recovery: Regulations and Private Lands in Northeastern*  
742 *North Carolina*. Wildlife Management Institute; 1998. pp. 451–456.
- 743 61. USFWS. Red wolf. In: *Southeast Region of the U.S. Fish and Wildlife Service [Internet]*.  
744 2020 [cited 5 May 2018]. Available:  
745 <https://www.fws.gov/southeast/wildlife/mammal/red-wolf/>

- 746 62. Persson J, Rauset GR, Chapron G. Paying for an Endangered Predator Leads to Population  
747 Recovery. *Conserv Lett.* 2015;8: 345–350. doi:10.1111/conl.12171
- 748 63. Zabel A, Holm-Müller K. Conservation Performance Payments for Carnivore Conservation  
749 in Sweden. *Conserv Biol.* 2008;22: 247–251. doi:10.1111/j.1523-1739.2008.00898.x
- 750 64. Treves A, Artelle KA, Paquet PC. Differentiating between regulation and hunting as  
751 conservation interventions. *Conserv Biol.* 2019;33: 472–475. doi:10.1111/cobi.13211
- 752 65. Phillips MK, Henry VG, Kelly BT. Restoration of the red wolf. 2003.
- 753 66. Li Y-W, Roman J, Wilcove DS, Male T, Doremus H. Species protection will take more than  
754 rule reversal. *Science.* 2020;370: 665–666.
- 755 67. Weller E. 5-YEAR REVIEW Red Wolf (*Canis rufus*). USFWS; 2018.
- 756 68. Rabon D, Bartel R, Beyer A. Red Wolf Adaptive Management Plan FY13-FY15. U S Fish Wildl  
757 Serv Manteo N C. 2013.
- 758



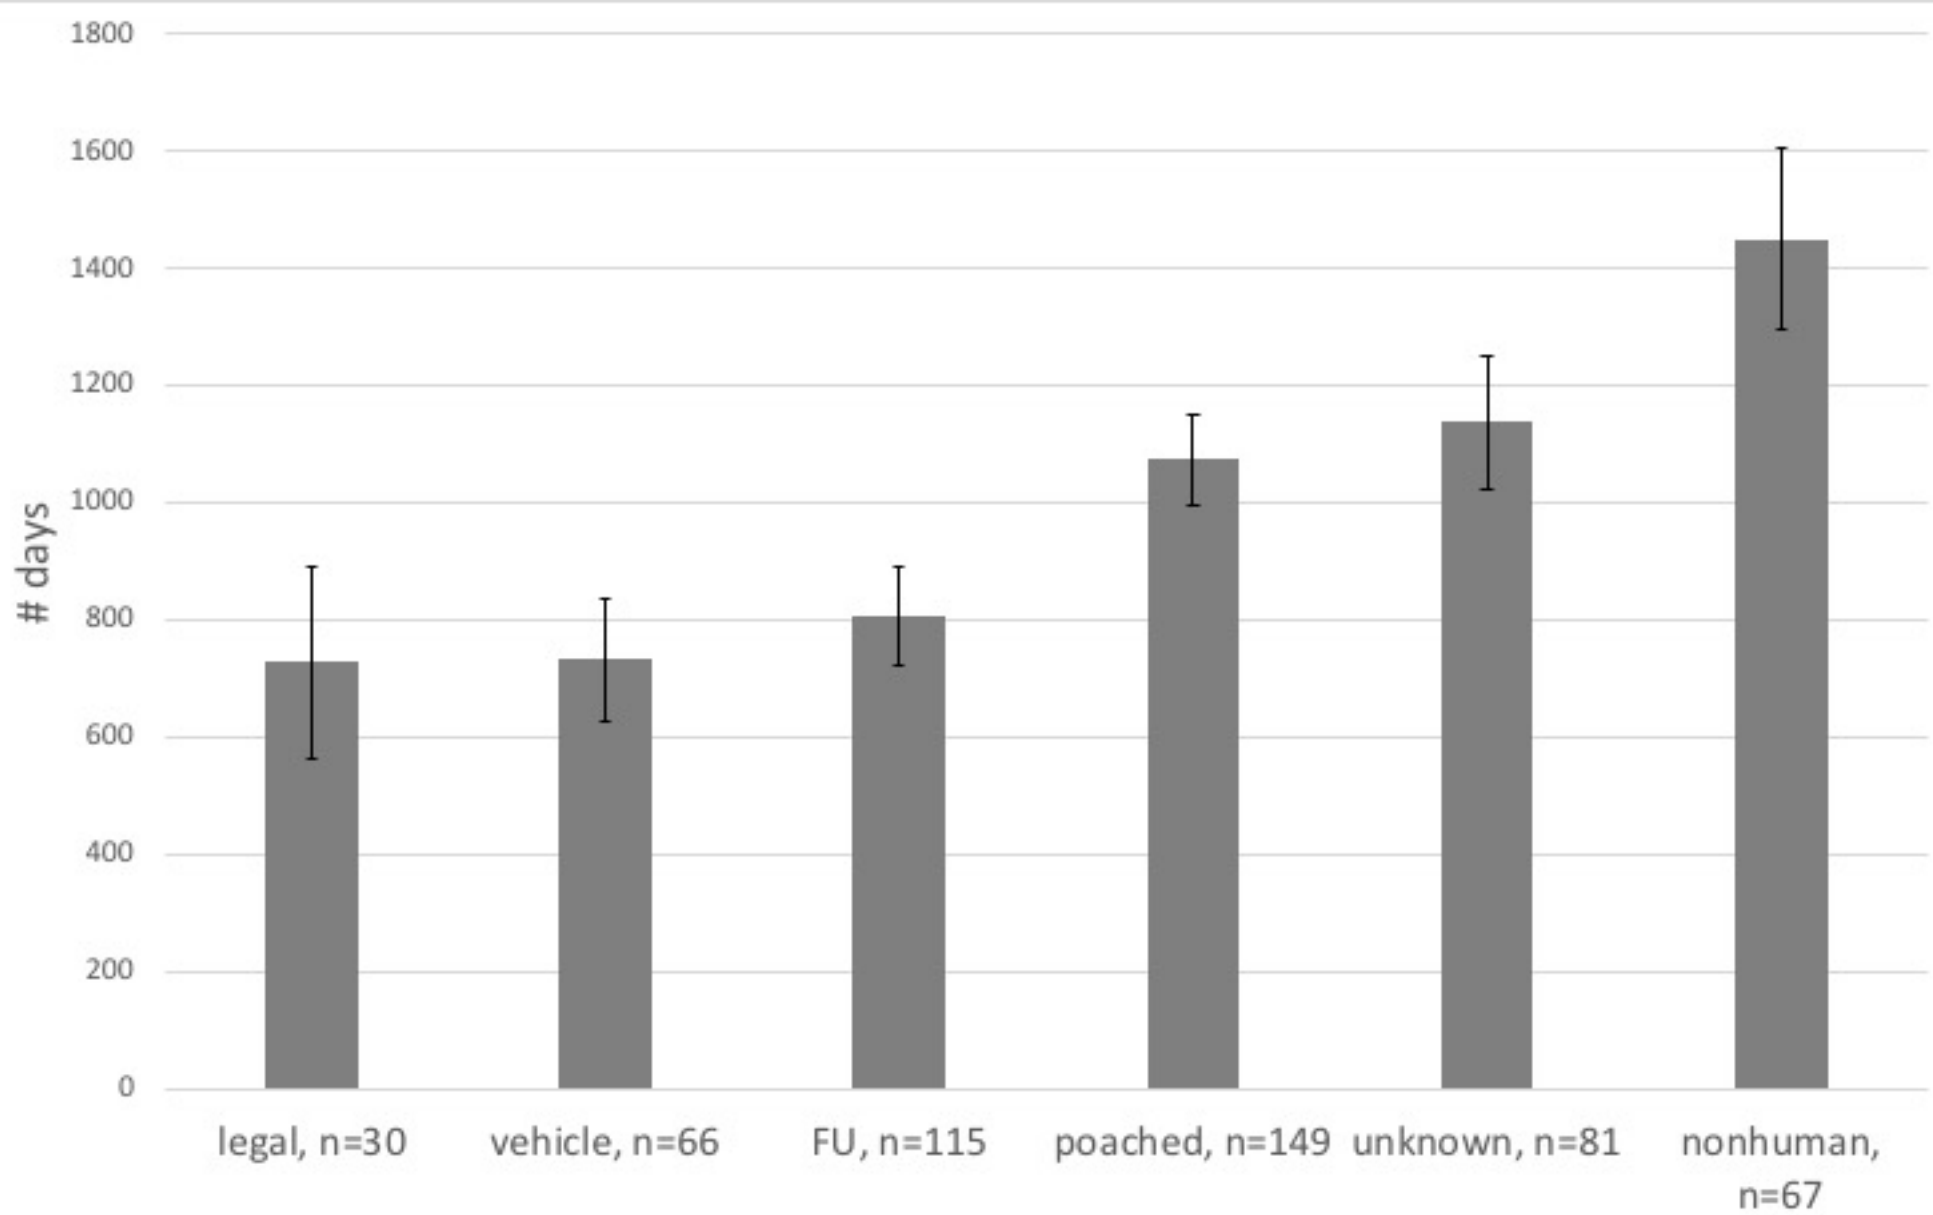

Fig 6

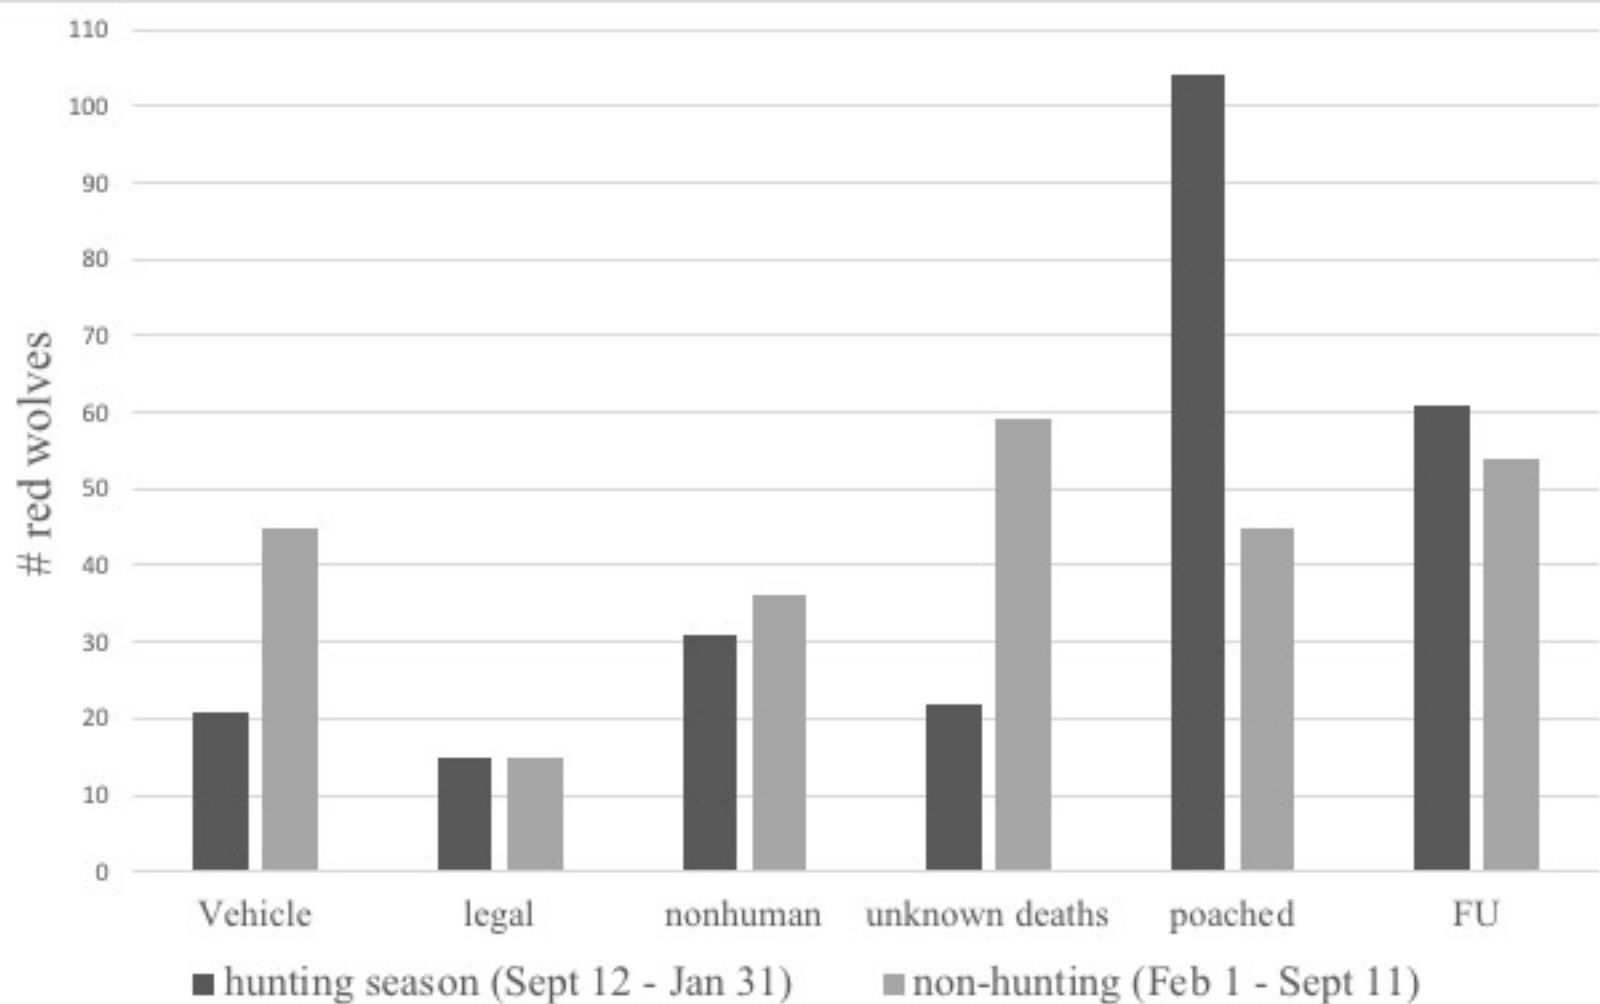

Fig 5

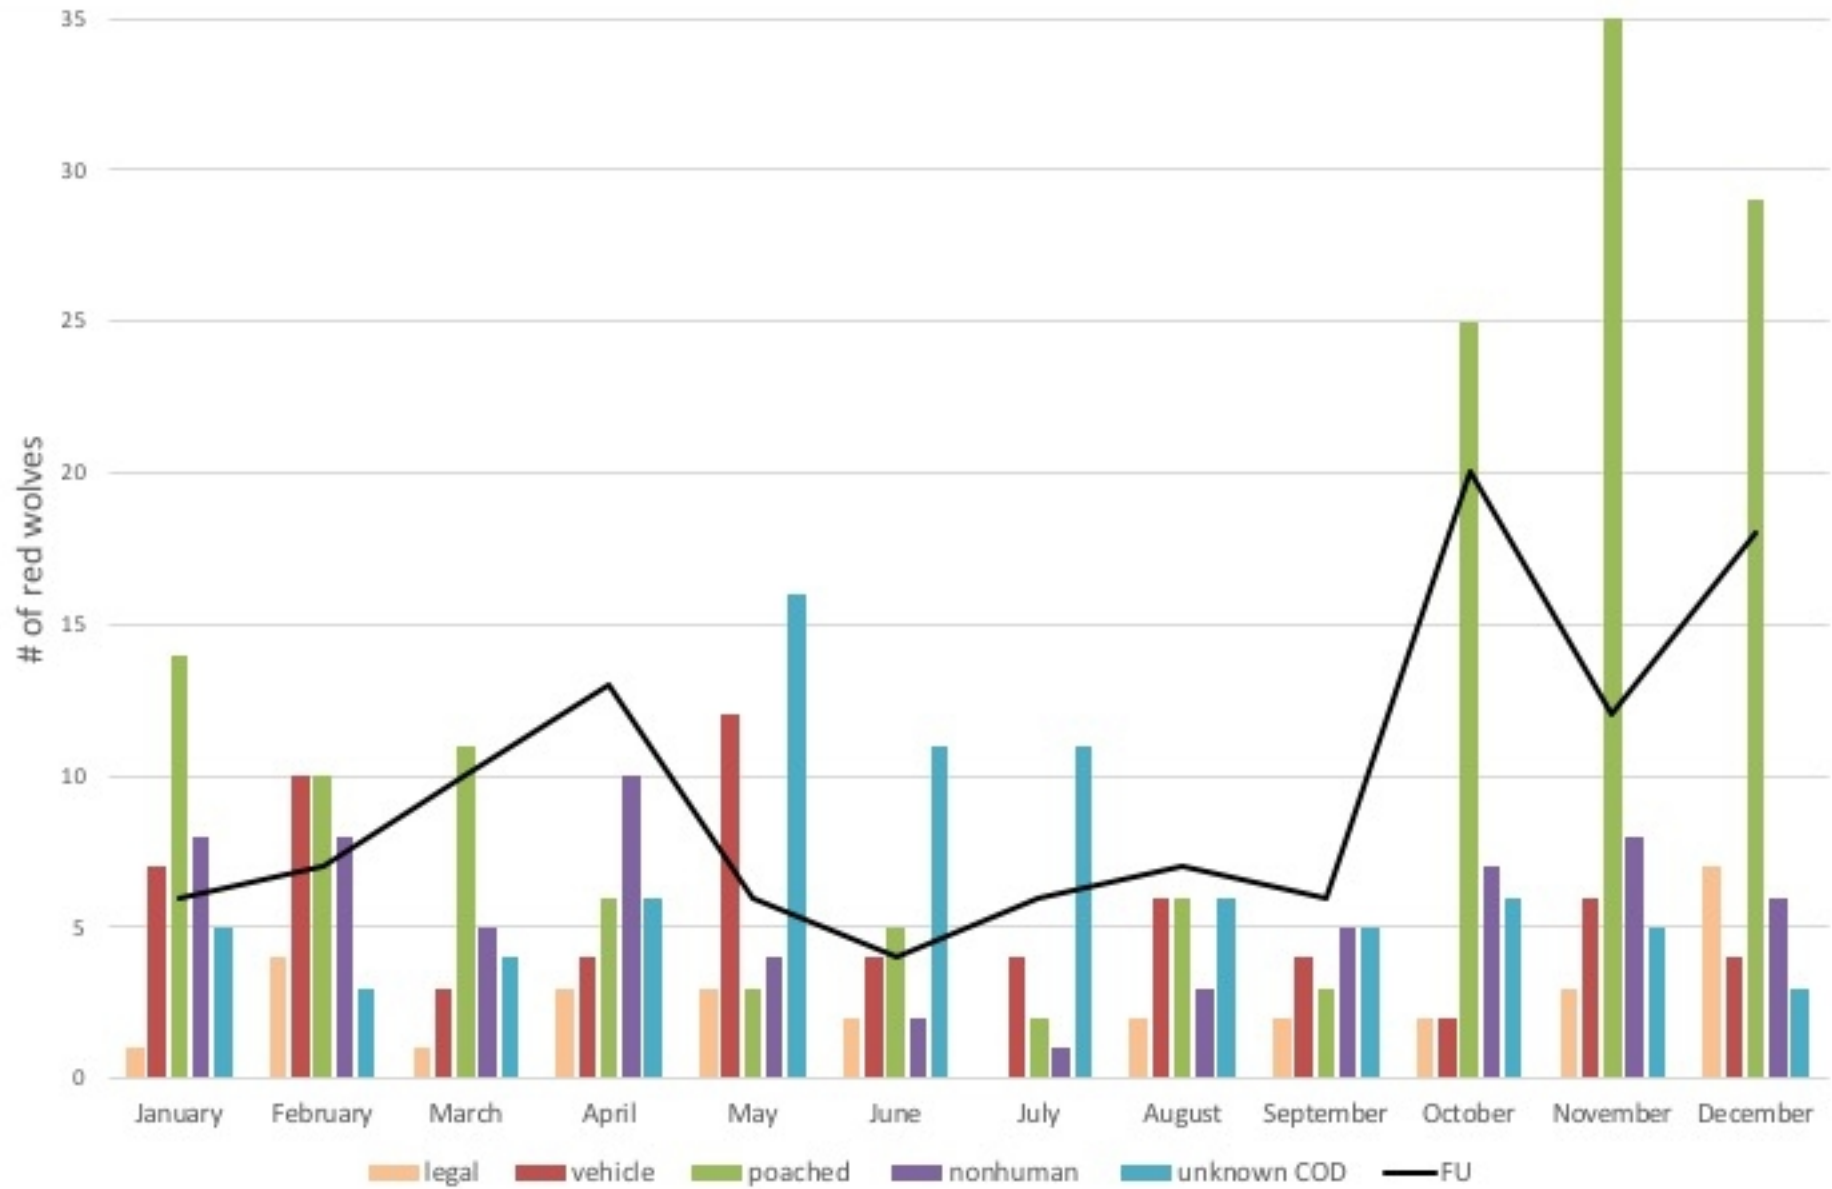

Fig 4

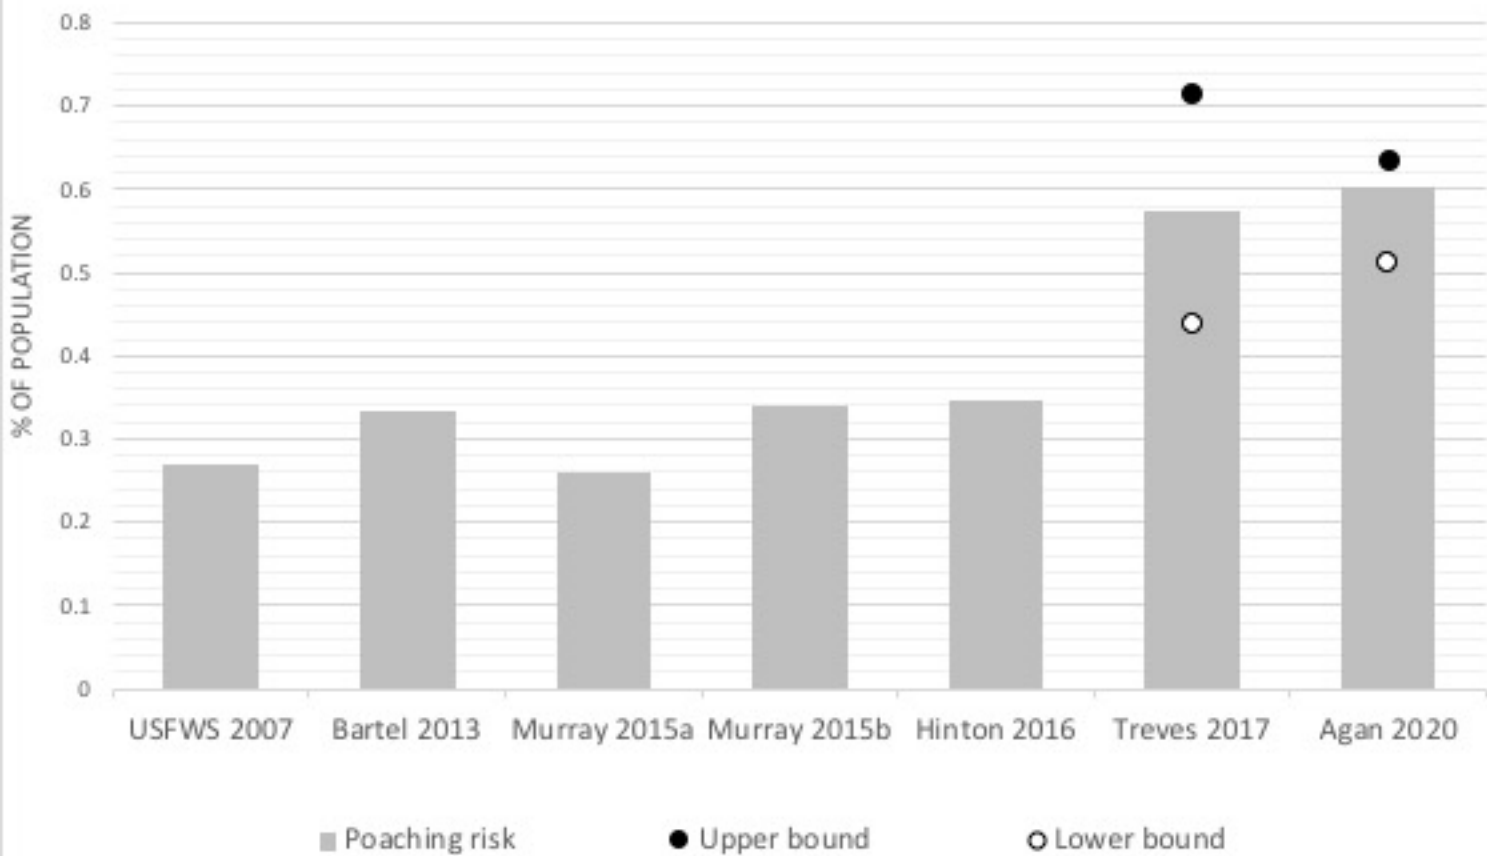

Fig 3

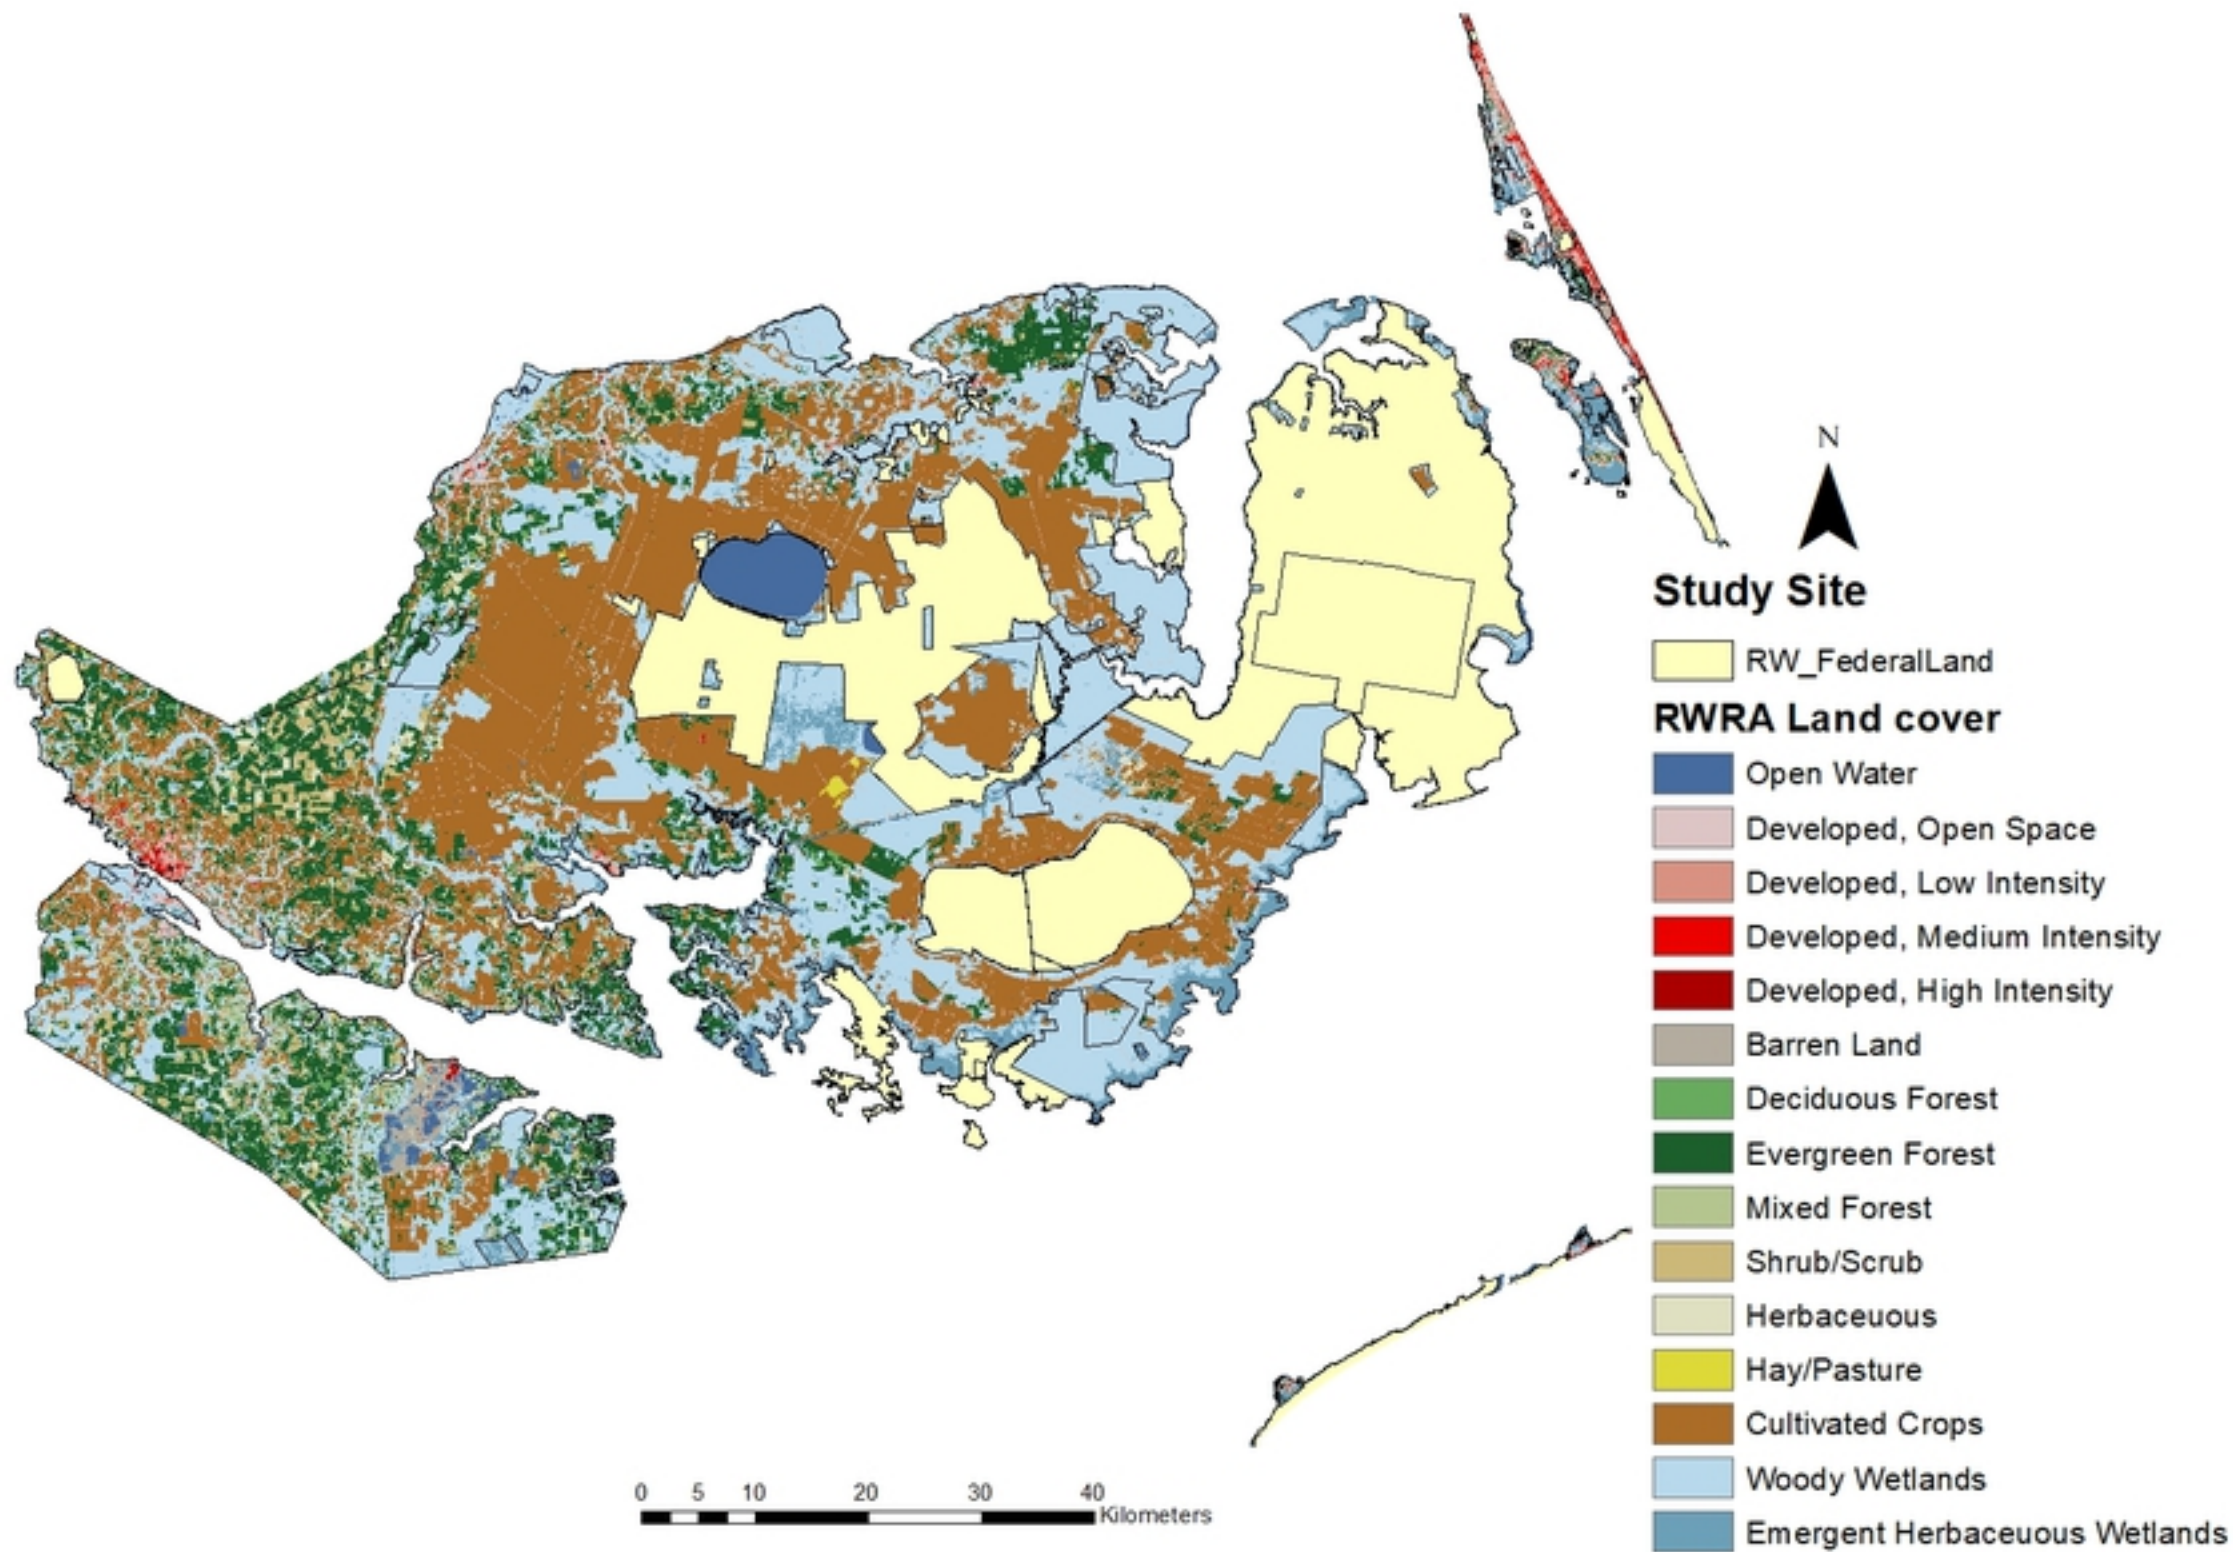

Fig 1

# What happens to dead or missing collared wolves

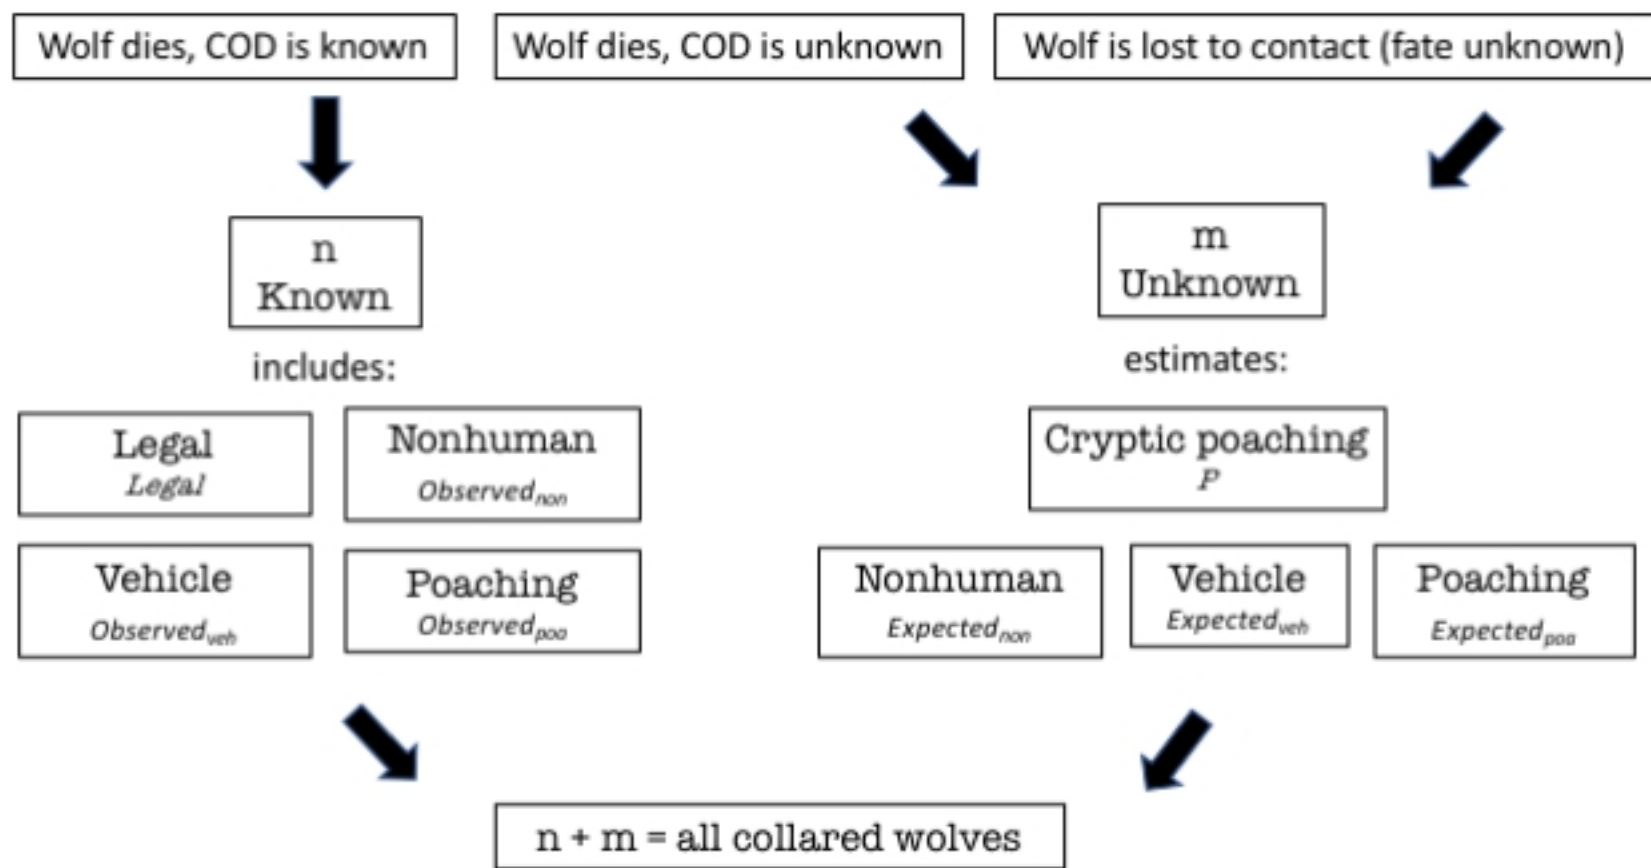

Fig 2
